# Supplementary material
Source: Springer Nature journal article supplement (https://www.springermedizin.de/resource/supplementary/13737_2013_37_MOESM12_ESM.pdf/9682130)
Supplement: MOESM12 [file 9682130]

# Panel ONE 04

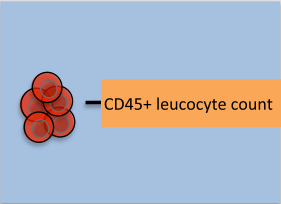

CD4+ T cells

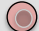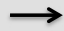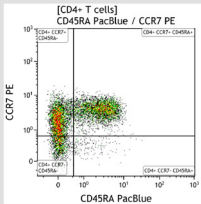

CCR7 / CD45RA

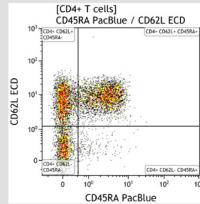

CD62L / CD45RA

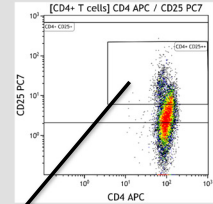

CD4 / CD25

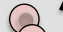

CD3+ T cells

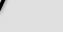

CD8+ T cells

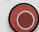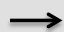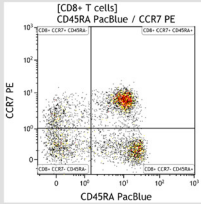

CCR7 / CD45RA

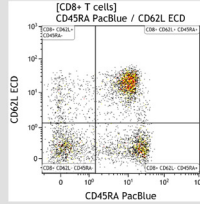

CD62L / CD45RA

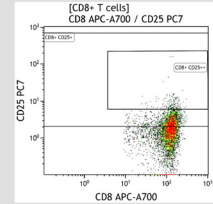

CD8 / CD25

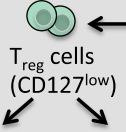

naive  
CD45RA<sup>+</sup>

memory  
CD45RA<sup>-</sup>

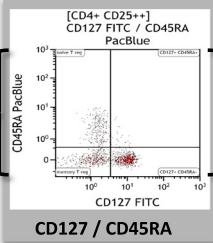

CD127 / CD45RA

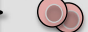

T<sub>eff</sub> cells  
(CD127<sup>high</sup>)
